# Supplementary material for: Kinesin-1 controls mast cell degranulation and anaphylaxis through PI3K-dependent recruitment to the granular Slp3/Rab27b complex
Source: PubMed Central journal article supplement — J Cell Biol. 2016 Oct 24;215(2):203–16. doi: 10.1083/jcb.201605073 (PMC5084650; doi:10.1083/jcb.201605073), 2016-10-24
Supplement: JCB_201605073_sm.pdf [file JCB_201605073_sm.pdf]

Munoz et al., <http://dx.doi.org/10.1083/jcb201605073>

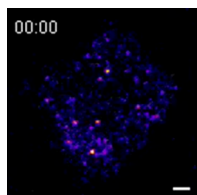

Video 1. TIRF video microscopy of WGA-488 (green)-labeled WT BMMCs for the 15 min immediately after Fc $\epsilon$ RI activation. Images were acquired every 200 ms and are displayed at 11 frames per second. Bar, 2  $\mu$ m.

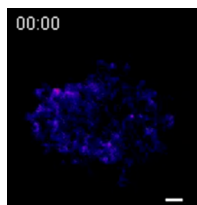

Video 2. TIRF video microscopy of WGA-488 (green)-labeled cKO<sup>Kif5b</sup> BMMCs for the 15 min immediately after Fc $\epsilon$ RI activation. Images were acquired every 200 ms and are displayed at 11 frames per second. Bar, 2  $\mu$ m.
